# Supplementary material
Source: Frontiers journal article supplement (https://www.frontiersin.org/articles/552628)
Supplement: Data_Sheet_1.PDF [file Data_Sheet_1.PDF]

# Supplementary Material

## 1 SUPPLEMENTARY TABLES AND FIGURES

### 1.1 Figures

#### Rate-coded output for various sCPG population sizes

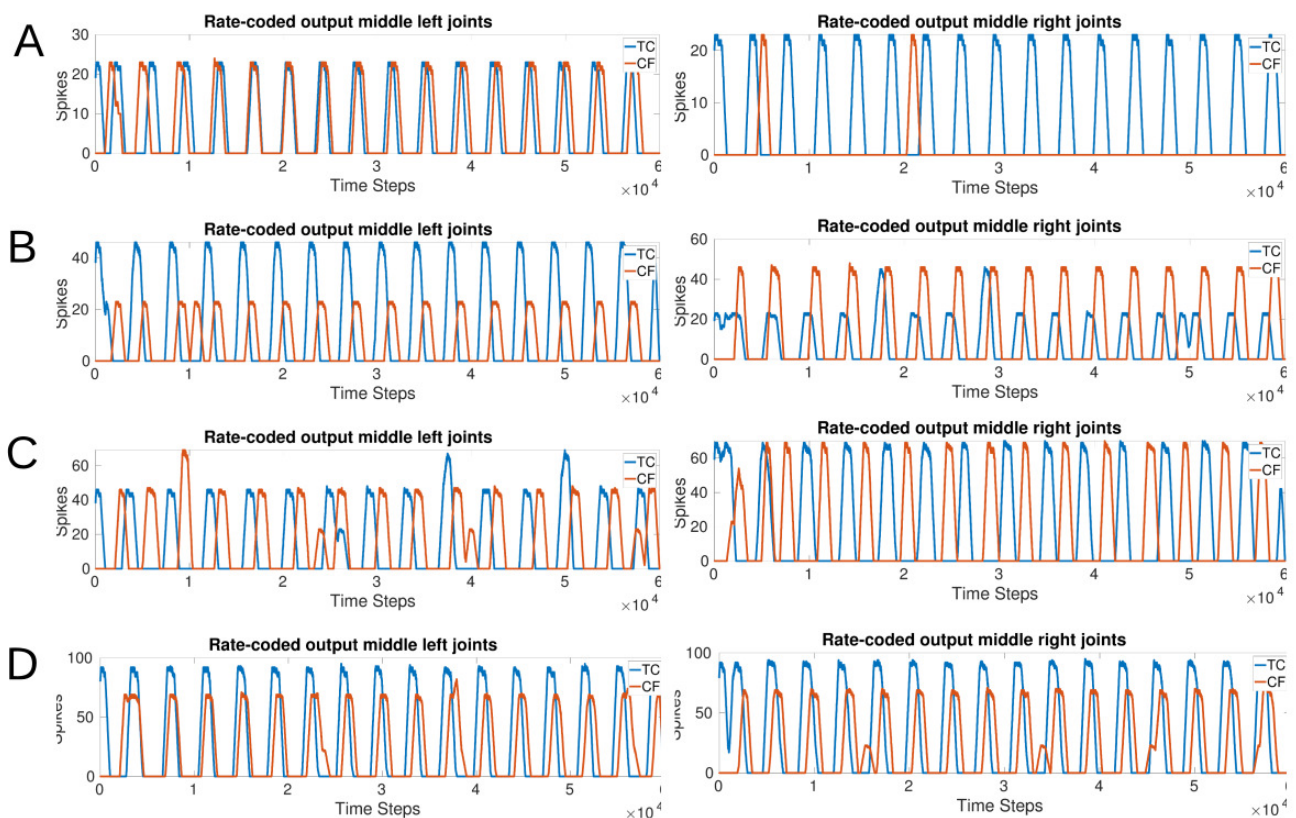

**Figure S1.** Rate-coded output for increasing population sizes. A: One neuron per population. B: Two neurons per population. C: Three neurons per population. D: Four neurons per population.

## Rate-coded output for 6-neuron sCPG population

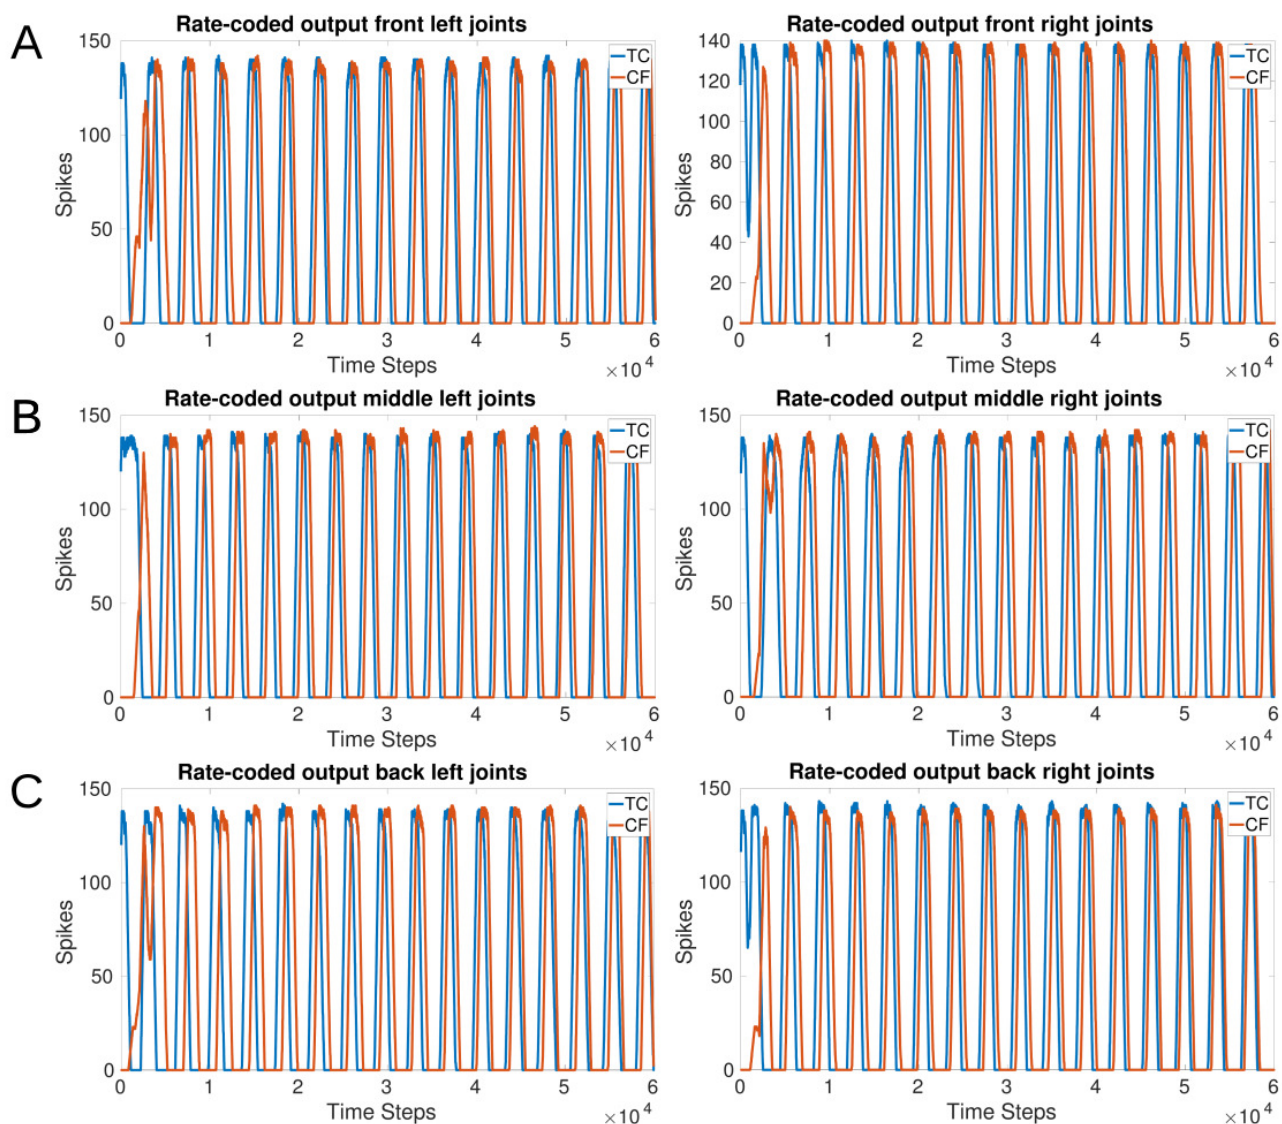

**Figure S2.** Rate-coded output for sCPGs with 6 neurons per population. A: Front legs. B: Middle legs. C: Back legs.

## Video of MORF walking

**Torque output for MORF walking at a single frequency**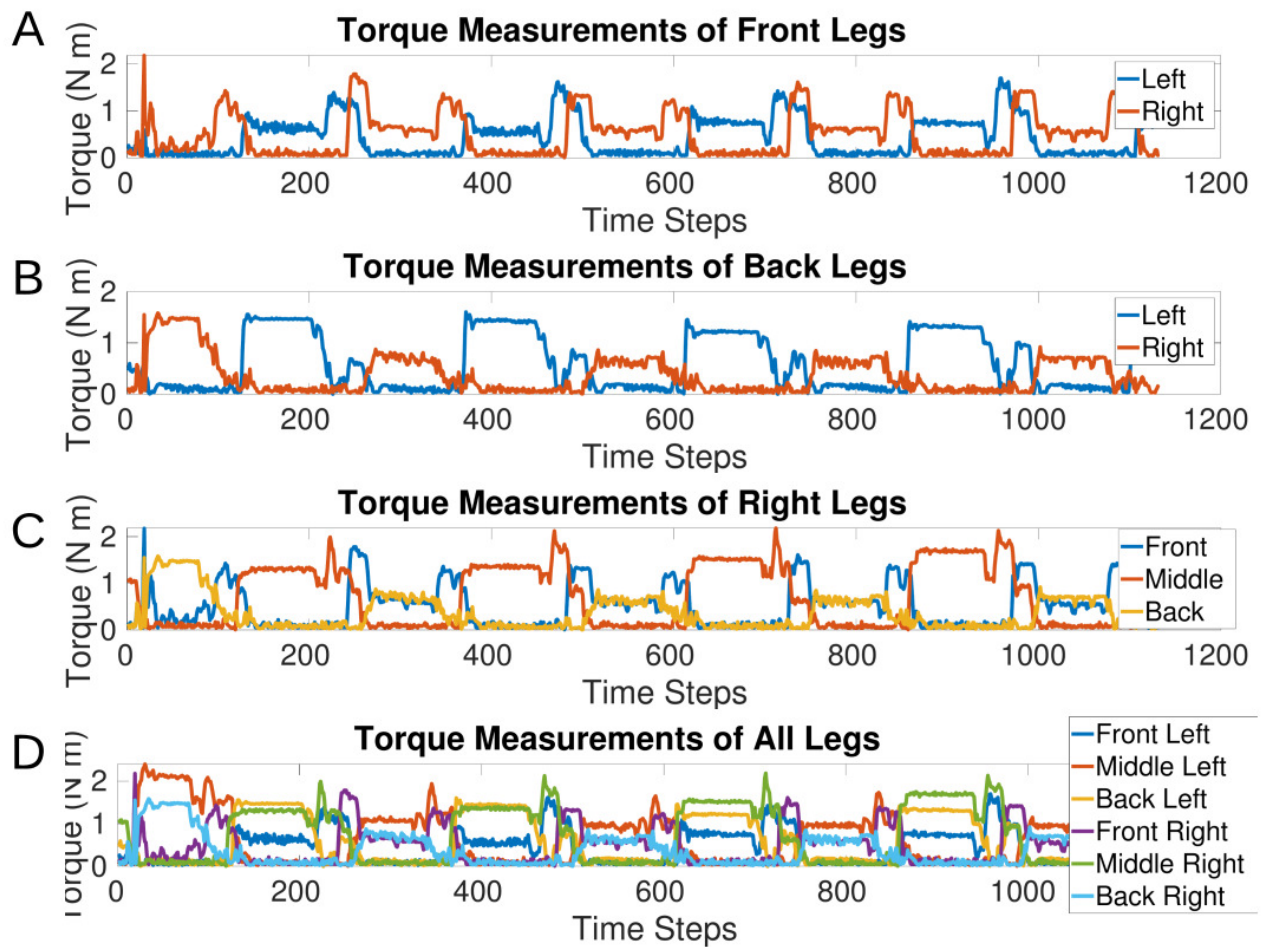

**Figure S3.** Converted torque measurement from Dynamixel motors when walking at a constant frequency.

## Torque output for MORF walking when switching between frequencies

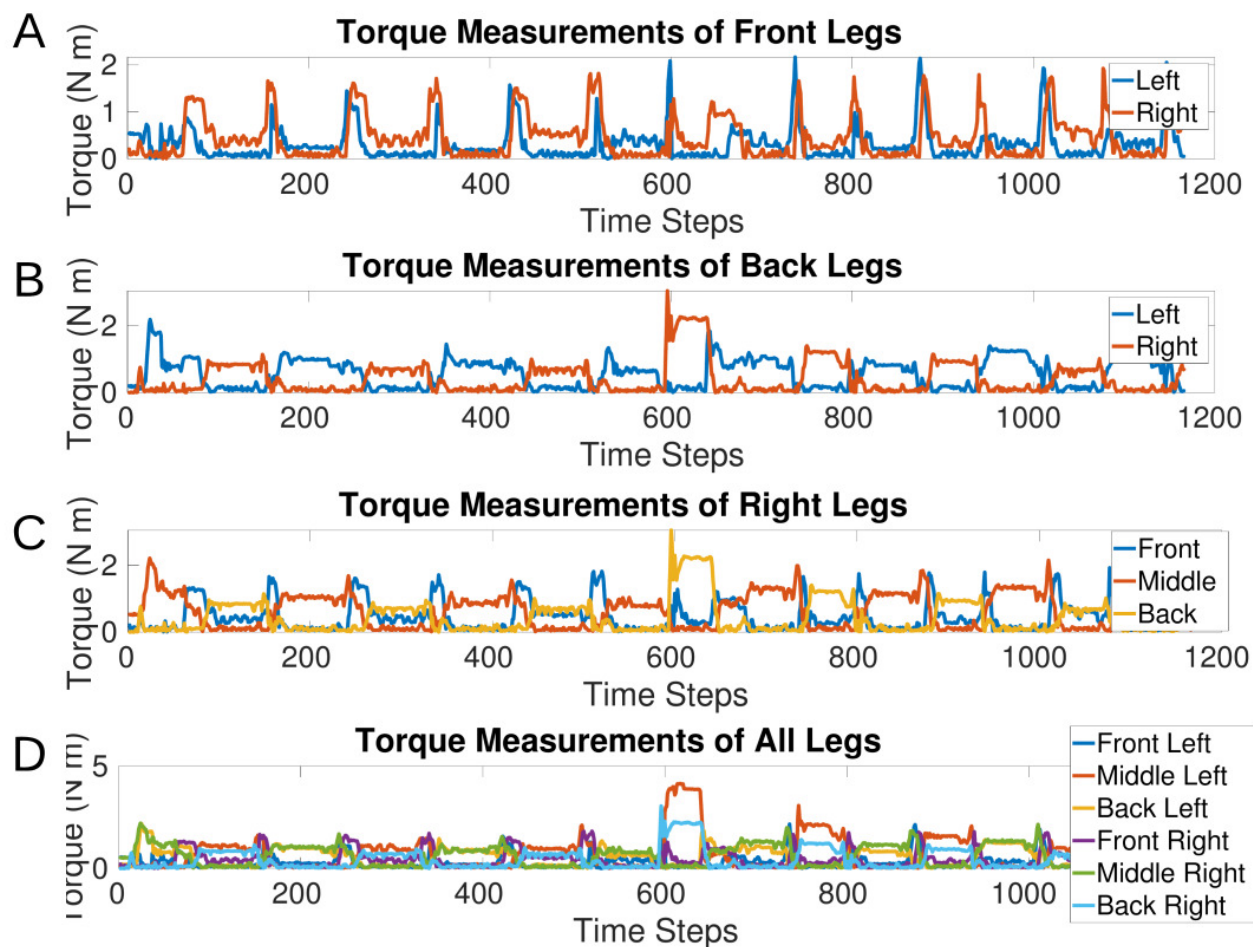

**Figure S4.** Converted torque measurement from Dynamixel motors when switching from one frequency to another.

## Complete network of distributed sCPGs

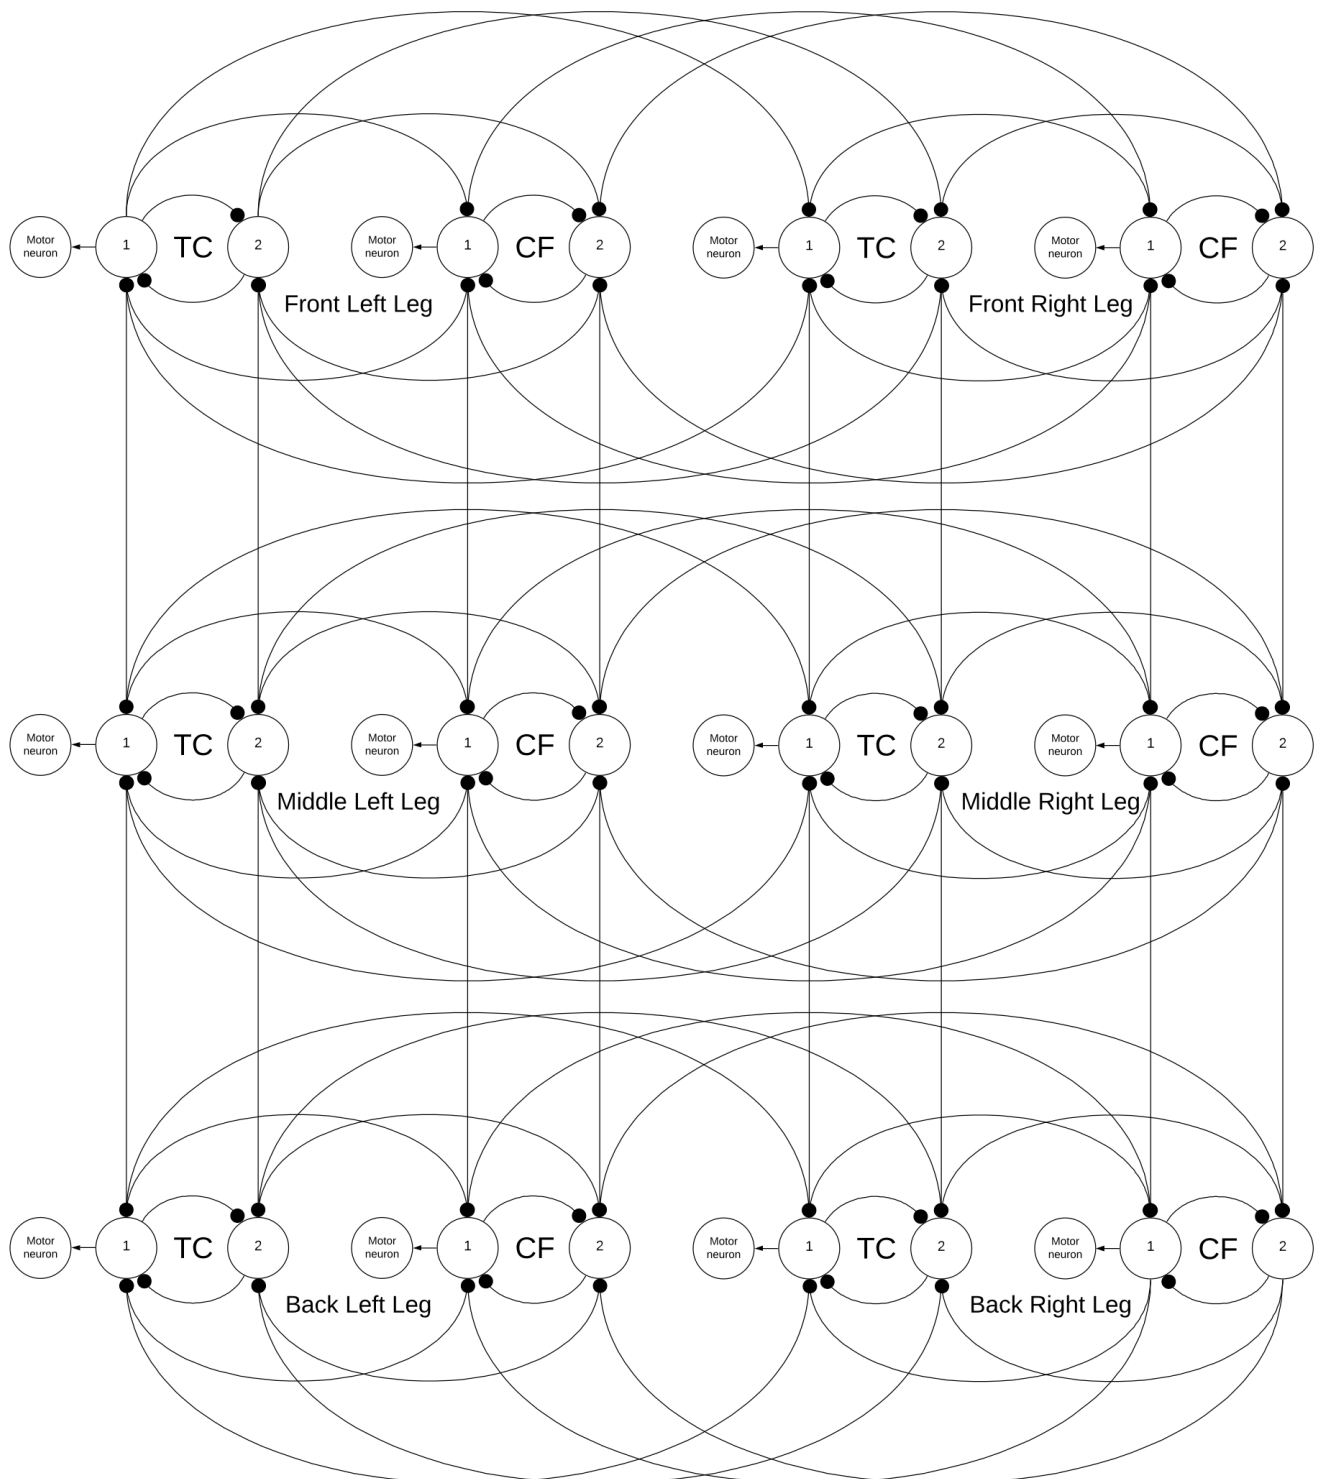

**Figure S5.** Complete diagram showing all connections between individual neuron populations in the distributed network. The inter-segmental mutual inhibition connections are shown as a single connection with inhibition on either end to simplify the diagram.
